# Supplementary material for: No Accumulation of Transposable Elements in Asexual Arthropods
Source: Oxford University Press journal article supplement (doi:10.1093/molbev/msv261), 2015-11-11
Supplement: msv261_Supplementary_Data.zip [file msv261_Supplementary_Data.zip]

## Supplementary Information

### No accumulation of transposable elements in asexual animals

Jens Bast<sup>1\*</sup>, Ina Schaefer<sup>2</sup>, Tanja Schwander<sup>1</sup>, Mark Maraun<sup>2</sup>, Stefan Scheu<sup>2</sup>, Ken Kraaijeveld<sup>3,4</sup>

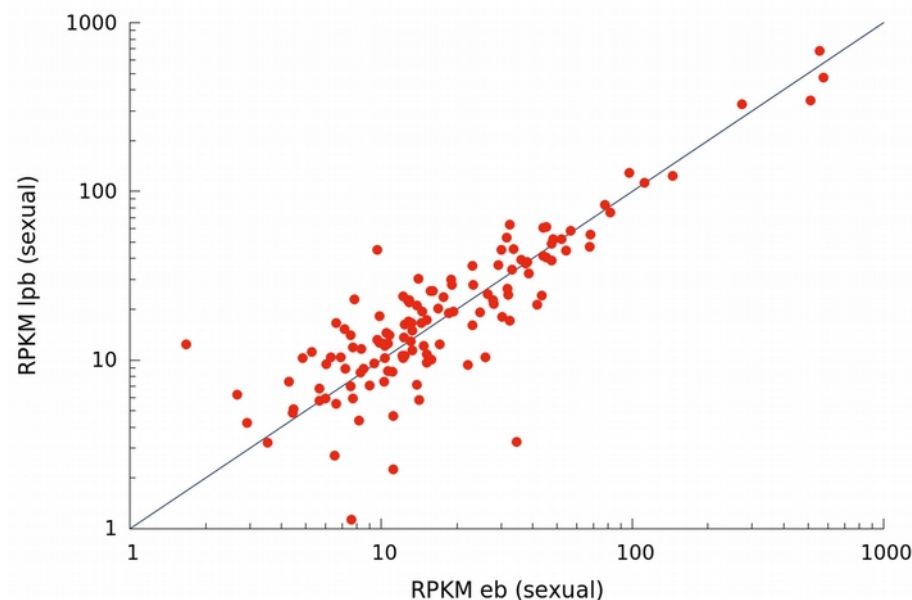

**Supplementary Figure 1:** Comparison of load (RPKM as proxy) per TE family between sexual lineages of *Daphnia*. Each point represents a specific element family in the TE library.

**Supplementary Table 1:** Complete TE content in sexual and asexual lineages calculated from reads mapping to the species-specific UTEs with 80% alignment homology. Ori: Oribatid mites, Lc: *Leptopilina clavipes*, Dp: *Daphnia pulex*, Ac: *Achipteria coleoptrata*, Hr: *Hypochthonius rufulus*, Sm: *Steganacarus magnus*, Pp: *Platynothrus peltifer*

| tax_group | Lineage | Mode | Total_reads | Mapped_reads | Percentage |
|-----------|---------|------|-------------|--------------|------------|
| Ori       | Ac      | sex  | 68023704    | 293628       | 0.43       |
| Ori       | Hr      | asex | 62628353    | 929356       | 1.48       |
| Ori       | Sm      | sex  | 54559873    | 1510343      | 2.77       |
| Ori       | Pp      | asex | 54940089    | 144433       | 0.26       |
| Lc        | epg     | sex  | 45085169    | 2540611      | 5.64       |
| Lc        | gbw     | asex | 47605995    | 2450454      | 5.15       |
| Dp        | eb      | sex  | 28650165    | 599742       | 2.09       |
| Dp        | sed     | asex | 29643143    | 644050       | 2.17       |
| Dp        | lp8b    | sex  | 28891907    | 615635       | 2.13       |
| Dp        | 5w      | asex | 29001545    | 571543       | 1.97       |

**Supplementary Table 2:** Sequencing data produced for four oribatid mite species and assembly statistics for contigs > 200 bp. Ac: *Achipteria coleoptrata*, Hr: *Hypochthonius rufulus*, Sm: *Steganacarus magnus*, Pp: *Platynothrus peltifer*

| Species         |                       | Ac        | Hr        | Sm       | Pp       |
|-----------------|-----------------------|-----------|-----------|----------|----------|
|                 | Mode of reproduction  | sexual    | asexual   | sexual   | asexual  |
| Sequencing data | Sequencing system     | HiSeq2000 | HiSeq2000 | GAllx    | GAllx    |
|                 | Insert size [bp]      | 300       | 300       | 300      | 300      |
|                 | Read-length [bp]      | 100       | 100       | 75       | 75       |
|                 | Number filtered reads | 290119558 | 274538142 | 58096450 | 57360134 |
|                 | Coverage              | ~176x     | ~120x     | ~16x     | ~19x     |
| Assemblies      | Assembler             | Platanus  | Platanus  | Abyss    | Abyss    |
|                 | Number contigs        | 56361     | 140559    | 101559   | 105693   |
|                 | N80 [bp]              | 1440      | 905       | 609      | 561      |
|                 | N50 [bp]              | 7410      | 4184      | 2446     | 1557     |
|                 | Max [bp]              | 158988    | 132029    | 53110    | 34640    |
|                 | Sum [bp]              | 87.47e6   | 171.8e6   | 112.6e6  | 99.84e6  |

**Supplementary Table 3:** Transposable element library construction and comparison of TE entries > 500bp. Ac: *Achipteria coleoptrata*, Hr: *Hypochthonius rufulus*, Sm: *Steganacarus magnus*, Pp: *Platynothrus peltifer*, Lc: *Leptopilina clavipes*, Dp: *Daphnia pulex*

| Species        |                          | Ac    | Hr    | Sm     | Pp    | Lc     | Dp     |
|----------------|--------------------------|-------|-------|--------|-------|--------|--------|
| Total repeats  | RepeatModeler            | 289   | 600   | 235    | 110   | -      | -      |
|                | Tedna                    | 266   | 218   | 207    | 95    | -      | -      |
|                | Combined after UCLUST    | 450   | 807   | 435    | 205   | -      | -      |
| Classified TEs | Number of TE sequences   | 74    | 117   | 153    | 16    | 162    | 229    |
|                | Number of super-families | 10    | 13    | 11     | 7     | 25     | 22     |
|                | Mean length [bp]         | 1016  | 848   | 999    | 1176  | 1886   | 3108   |
|                | Combined length [bp]     | 75200 | 99260 | 152965 | 18828 | 305641 | 711853 |
|                | Maximum size [bp]        | 4838  | 2505  | 4665   | 3899  | 11311  | 18820  |
